# Supplementary material
Source: publisher site journal article supplement (https://www.dovepress.com/article/442530)
Supplement: Supplementary file 1 [file get_supplementary_file.php]

**Supplementary materials for the following article:**

# Patient preferences for treatment in relapsed/refractory acute leukemia in the United Kingdom: a discrete choice experiment

David John Mottα*, Jake Hitchα,β, Samantha Nierγ, Zack Pemberton-Whiteleyγ,δ , Chris Skedgelα

αOffice of Health Economics, London, United Kingdom

βNuffield Department of Population Health, University of Oxford, Oxford, United Kingdom

γAcute Leukemia Advocates Network, Bern, Switzerland

δLeukemia Care, Worcester, United Kingdom

*Corresponding author: David John Mott [dmott@ohe.org](mailto:dmott@ohe.org)

**Table S1. Aggregate results**

|  | **Estimate** | **95% CI** |
| --- | --- | --- |
| **Mixed logit model output1** |  |  |
|  |  |  |
| **Coefficients** |  |  |
| Mode of administration2 |  |  |
| *-Outpatient injections and tablets3* | 0.340 | [0.047, 0.634] |
| *-Tablets only3* | 0.459 | [0.096, 0.822] |
| Quality of life during treatment | 0.036 | [0.026, 0.047] |
| Chance of response | 0.163 | [0.123, 0.203] |
| Duration of response | 0.119 | [0.029, 0.209] |
| Quality of life during response | 0.043 | [0.031, 0.055] |
|  |  |  |
| **Standard deviations** |  |  |
| Mode of administration2 |  |  |
| *-Outpatient injections and tablets3* | 0.055 | [-0.782, 0.891] |
| *-Tablets only3* | 0.881 | [0.386, 1.376] |
| Quality of life during treatment | 0.024 | [0.012, 0.035] |
| Chance of response | 0.102 | [0.069, 0.135] |
| Duration of response | 0.322 | [0.209, 0.436] |
| Quality of life during response | 0.029 | [0.018, 0.039] |
|  |  |  |
| **Model information** |  |  |
| Log-likelihood | -495 | |
| Number of respondents | 95 | |
| Number of observations | 2,220 | |
|  |  |  |
| **Post-estimation results** |  |  |
|  |  |  |
| **Relative attribute importance (%)** |  |  |
| Mode of administration | 2.5 | [0.6, 4.5] |
| Quality of life during treatment | 10.1 | [7.7, 12.4] |
| Chance of response | 67.6 | [62.4, 72.8] |
| Duration of response | 7.9 | [2.5, 13.3] |
| Quality of life during response | 11.9 | [9.4, 14.4] |
|  |  |  |
| **Marginal rates of substitution4** |  |  |
| Outpatient injections and tablets3 | 2.1 | [0.3, 3.9] |
| Tablets only3 | 2.8 | [0.6, 5.0] |
| 10% QOL improvement (during treatment) | 2.2 | [1.7, 2.8] |
| 3-month increase in duration of response | 2.2 | [0.6, 3.8] |
| 10% QOL improvement (during response) | 2.6 | [2.0, 3.3] |
|  |  |  |

CI = Confidence Interval. QOL = Quality of Life.

1Mixed logit model with uncorrelated parameters and all parameters modelled as random and normally distributed, using 5,000 Halton draws.

2Dummy coded.

3The reference category is “Injections (requiring an inpatient hospital stay) followed by tablets (taken at home)”. Full labels are “Injections (at regular outpatient hospital appointments) and tablets (taken at home)” and “Tablets (taken at home)”.

4These are estimates of the extent to which respondents would be willing to trade off some chance of response to achieve some favourable change in other treatment characteristics (as listed in the table).

**Table S2. Results by acute leukemia type**

|  | **AML** | | **ALL** | | **APL** | |
| --- | --- | --- | --- | --- | --- | --- |
|  | **Estimate** | **95% CI** | **Estimate** | **95% CI** | **Estimate** | **95% CI** |
| **Conditional logit model output1** |  |  |  |  |  |  |
|  |  |  |  |  |  |  |
| **Coefficients** |  |  |  |  |  |  |
| Mode of administration2 |  |  |  |  |  |  |
| *-Outpatient injections and tablets3* | 0.221 | [0.004, 0.438] | 0.214 | [-0.206, 0.633] | 0.105 | [-0.357, 0.567] |
| *-Tablets only3* | 0.378 | [0.088, 0.667] | -0.039 | [-0.515, 0.438] | -0.130 | [-0.664, 0.404] |
| Quality of life during treatment | 0.019 | [0.012, 0.026] | 0.020 | [0.006, 0.033] | 0.030 | [0.019, 0.042] |
| Chance of response | 0.064 | [0.046, 0.083] | 0.107 | [0.065, 0.150] | 0.118 | [0.045, 0.191] |
| Duration of response | 0.031 | [-0.022, 0.084] | 0.134 | [0.015, 0.254] | 0.069 | [-0.048, 0.186] |
| Quality of life during response | 0.021 | [0.013, 0.028] | 0.025 | [0.011, 0.040] | 0.029 | [0.014, 0.044] |
|  |  |  |  |  |  |  |
| **Model information** |  |  |  |  |  |  |
| Log-likelihood | -376 | | -112 | | -61 | |
| Number of respondents | 61 | | 22 | | 12 | |
| Number of observations | 1,434 | | 498 | | 288 | |
|  |  |  |  |  |  |  |
| **Post-estimation results** |  |  |  |  |  |  |
|  |  |  |  |  |  |  |
| **Relative attribute importance (%)** |  |  |  |  |  |  |
| Mode of administration | 5.0 | [1.0, 9.0] | 2.1 | [-1.2, 5.4] | 1.8 | [-4.0, 7.6] |
| Quality of life during treatment | 12.5 | [8.7, 16.3] | 8.1 | [4.2, 12.1] | 11.7 | [5.1, 18.3] |
| Chance of response | 63.8 | [55.2, 72.4] | 66.1 | [57.4, 74.9] | 68.8 | [54.4, 83.1] |
| Duration of response | 4.9 | [-3.4, 13.2] | 13.3 | [0.8, 25.8] | 6.4 | [-3.4, 16.2] |
| Quality of life during response | 13.7 | [9.9, 17.6] | 10.4 | [5.9, 14.9] | 11.4 | [5.1, 17.6] |
|  |  |  |  |  |  |  |
| **Marginal rates of substitution4** |  |  |  |  |  |  |
| Outpatient injections and tablets3 | 3.4 | [-0.2, 7.1] | 2.0 | [-1.9, 5.9] | 0.9 | [-3.1, 4.9] |
| Tablets only3 | 5.9 | [0.9, 10.8] | -0.4 | [-4.8, 4.1] | 1.1 | [-6.0, 3.8] |
| 10% QOL improvement (during treatment) | 2.9 | [1.9, 4.0] | 1.8 | [1.0, 2.6] | 2.5 | [0.7, 4.4] |
| 3-month increase in duration of response | 1.5 | [-1.1, 4.0] | 3.8 | [-0.2, 7.7] | 1.7 | [-1.1, 4.6] |
| 10% QOL improvement (during response) | 3.2 | [2.1, 4.3] | 2.4 | [1.4, 3.4] | 2.5 | [0.8, 4.1] |
|  |  |  |  |  |  |  |

CI = Confidence Interval. QOL = Quality of Life.

1Conditional logit models with clustered standard errors.

2Dummy coded.

3The reference category is “Injections (requiring an inpatient hospital stay) followed by tablets (taken at home)”. Full labels are “Injections (at regular outpatient hospital appointments) and tablets (taken at home)” and “Tablets (taken at home)”.

4These are estimates of the extent to which respondents would be willing to trade off some chance of response to achieve some favourable change in other treatment characteristics (as listed in the table).
